# Supplementary material for: Quality-of-Life Assessment in Pediatric Advanced Cancer: Development of the Patient-Reported Outcome Measure Advance QoL
Source: MDPI journal article supplement (doi:10.3390/curroncol31040170), 2024-04-19
Supplement: s1 [file s1]

## **Supplementary material A**

### **File S1. Interview guide**

#### **Semi-structured cognitive interview**

\*Note: Verbal and para-verbal language (Mmm, okay, I see, etc.) will be used to encourage the participant to express his or her point of view.

##### For each questionnaire item

- What does that mean to you? / What did you understand from the question? / Could you tell me in your own words what is required?
- Are there any words or expressions that are difficult to understand? / Are there any expressions that are unclear? / Are there any words or expressions you think we should avoid?
  - What don't you understand? / What makes it difficult? / What could be replaced to make it easier to understand?
  - What would help you understand better?
- Do the examples help you better understand what is being asked?

##### Measurement scale

- Version for 8-12 years: Is the use of the smiley faces clear to you?
- Version for 13-18 years: Is the “bad, average and good” scale clear to you?

##### Recall period

- What do you think of using the 24-hour period (in the last day) to fill in the tool?
- Do you have any suggestions for improvement?

## Supplementary material B

**Table S1.** Result of the content-validity index (CVI) <sup>a</sup>.

| Item                                                                                               | Children (N = 6) |                  |                 | Adolescents (N = 6) |       |      |
|----------------------------------------------------------------------------------------------------|------------------|------------------|-----------------|---------------------|-------|------|
|                                                                                                    | Agreement        | I-CVI            | UA <sup>b</sup> | Agreement           | I-CVI | UA   |
| 1. I understand what is being asked.                                                               | 6                | 1                | 1               | 6                   | 1     | 1    |
| 2. The tool is easy to use.                                                                        | 4                | 0.67             | 0               | 6                   | 1     | 1    |
| 3. The tool is useful for assessing my well-being.                                                 | 6                | 1                | 1               | 6                   | 1     | 1    |
| 4. The length of the questionnaire is acceptable.                                                  | 6                | 1                | 1               | 6                   | 1     | 1    |
| 5. The tool is appropriate for assessing the well-being of other young people with cancer like me. | 6                | 1                | 1               | 6                   | 1     | 1    |
| 6. The tool allows me to describe what's not going so well in my life.                             | 6                | 1                | 1               | 6                   | 1     | 1    |
| 7. There are disadvantages to completing the tool <sup>c</sup> .                                   | 4                | 0.67             | 0               | 6                   | 1     | 1    |
| 8. I liked the tool.                                                                               | 6                | 1                | 1               | 6                   | 1     | 1    |
| 9. I recommend using the tool.                                                                     | 6                | 1                | 1               | 6                   | 1     | 1    |
| 10. I am motivated to use the tool.                                                                | 6                | 1                | 1               | 5                   | 0.83  | 0    |
|                                                                                                    |                  | <b>S-CVI/Ave</b> | 0.93            |                     |       | 0.98 |
|                                                                                                    |                  | <b>S-CVI/UA</b>  | 0.8             |                     |       | 0.9  |
| <b>Average proportion of items judged as relevance across the experts</b>                          |                  | 0.93             |                 | 0.98                |       |      |

<sup>a</sup> Based on Yusoff (2019). *Education in Medicine Journal* 11(2): 49-54.

<sup>b</sup> Universal agreement.

<sup>c</sup> Reversed-coded item.
